# Supplementary material
Source: Springer Nature journal article supplement (https://www.springermedizin.de/resource/supplementary/13012_2013_847_MOESM3_ESM.pdf/9630582)
Supplement: MOESM3 [file 9630582]

## Reported practice

GP conducts a formal cognitive assessment using a validated scale (Category 1)

GP assesses cognitive function using other clinical criteria (Category 2)

GP refers to ACAT for cognitive assessment (Category 3)

GP refers to specialist without conducting a cognitive assessment (Category 4)

No cognitive assessment conducted, no referral initiated (Category 5)

## Domains and themes

### Knowledge:

- Aware of need to assess cognitive function when diagnosing dementia
- Aware of test to use

### Skills:

- Know how to administer MMSE

### Beliefs about capabilities:

- Confident in administering MMSE

### Environmental context & resources:

- Have access to MMSE
- Have time/practice nurse to conduct MMSE

### Behavioural regulation:

- Routine part of dementia assessment

### Beliefs about consequences:

- Believe patients find it uncomfortable/embarrassing to be tested
- Believe MMSE not a good measure of cognitive function
- Believe MMSE doesn't provide useful additional information

### Social Influences:

- Patients find it uncomfortable/embarrassing to be tested

### Emotion:

- GP uncomfortable in administering MMSE

### Skills:

- GP lacks skills in administering MMSE

### Beliefs about capabilities:

- Believe able to assess as well clinically

### Environmental context & resources:

- Lack of access to test

### Environmental context & resources:

- Lack of time/resources to conduct MMSE

### Beliefs about consequences:

- Preferable for someone else to conduct MMSE to enable independent assessment
- Believe ACAS assessment needed anyway (for other reasons)
- Believe patients find it uncomfortable to be assessed by the GP

### Social Influences:

- Patients find it uncomfortable to be assessed by the GP

### Emotion:

- GP uncomfortable testing patients/administering MMSE

### Skills:

- GP lacks skills in administering MMSE

### Beliefs about capabilities:

- GP lacks confidence in administering MMSE

### Beliefs about consequences:

- Believe patients find it uncomfortable/embarrassing to be tested
- Preferable for someone else to conduct MMSE to enable independent assessment
- Believe MMSE unnecessary as cognitive impairment obvious

### Social Influences:

- Patient/family request specialist referral
- Patients find it uncomfortable/embarrassing to be tested

### Emotion:

- GP uncomfortable testing patients/administering MMSE

### Skills:

- GP lacks skills in administering MMSE

### Beliefs about capabilities:

- GP lacks confidence in administering MMSE

### Social Influences:

- Patient/family refuse assessment

### Beliefs about consequences:

- Believe cognitive impairment not problematic (at current stage) and cognitive assessment won't provide useful information
- Believe patients can self report cognitive impairment

### Skills:

- GP unable to convince patient/family of need to be assessed
